# Supplementary material for: Ternary Fe3O4/reduced graphene oxide/phytic acid doped polyaniline hybrid based supercapacitive electrode with high capacitance retention and good cycling stability
Source: Royal Society of Chemistry journal article supplement (doi:10.1039/d3nj01150j), 2023-01-01
Supplement: d3nj01150j1.pdf [file d3nj01150j1.pdf]

# Supporting Information

## **Ternary Fe<sub>3</sub>O<sub>4</sub>/reduced graphene oxide /phytic acid doped polyaniline hybrid based supercapacitive electrode with high capacitance retention and good cycling stability**

Yaxiong Zhao <sup>a,b</sup>, Ming Zhou <sup>a,b \*</sup>, Ruifeng Ni<sup>a,b</sup>, Yi Li<sup>a,b</sup>, Jiangyu Huang  
<sup>a,b</sup>, Zhenyu Li <sup>a,b,c</sup> and Jingyu Chen <sup>a,b,c,\*</sup>

<sup>a</sup> Research Center of Energy Polymer Materials, School of New Energy  
and Materials, Southwest Petroleum University, Chengdu, 610500, P.  
R. China

<sup>b</sup> State Key Laboratory of Oil and Gas Reservoir Geology and  
Development Engineering, Southwest Petroleum University, Chengdu,  
610500, P. R. China

<sup>c</sup> Chengdu Evermaterials Co., Ltd, Pidun 610000, P. R. China

Email: [mr.zhouming@163.com](mailto:mr.zhouming@163.com)& [jingyu.chen@swpu.edu.cn](mailto:jingyu.chen@swpu.edu.cn)

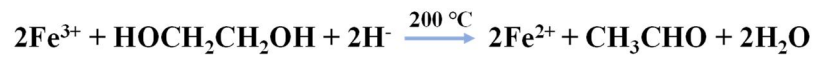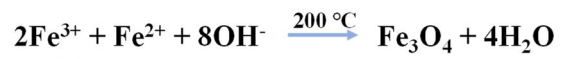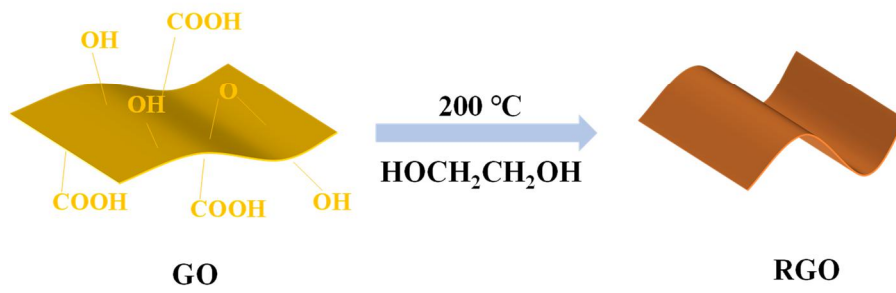

**Figure S1** Synthesis mechanism of  $\text{Fe}_3\text{O}_4$  and RGO.

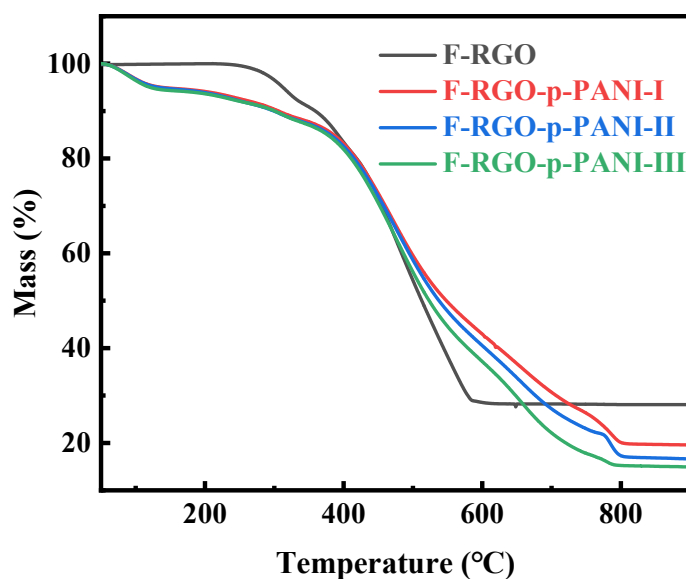

Figure S2 (a) TGA curves of F-RGO, F-RGO-p-PANI-I, F-RGO-p-PANI-II and F-RGO-p-PANI-III hybrids.

From the TGA curve (Figure S2), it could be confirmed the mass ratio of RGO to  $\text{Fe}_3\text{O}_4$  is 71.92 wt.%: 28.08 wt.%, in which RGO was totally degraded and  $\text{Fe}_3\text{O}_4$  was entirely oxidized to  $\text{Fe}_2\text{O}_3$ .<sup>1-4</sup> Thus from the TGA curve with F-RGO, F-RGO-p-PANI-I, F-RGO-p-PANI-II and F-RGO-p-PANI-III hybrids, it could define the  $\text{Fe}_3\text{O}_4$  content was 18.91 wt.%, 16.06 wt.% and 14.44 wt.%. Therefore, the RGO mass ratios should be 50.77 wt.%, 43.12 wt.% and 38.76 wt.%, respectively. Furthermore, the PANI content within different RGO-p-PANI hybrids was also calculated as 30.32 wt.%, 40.82 wt.% and 46.80 wt.%.

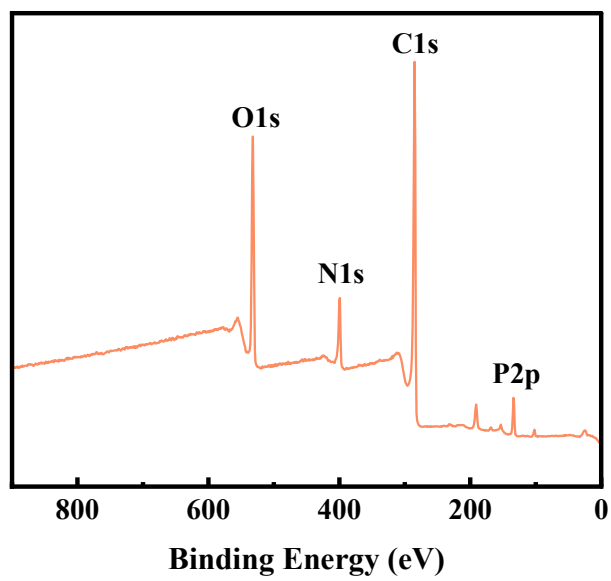

**Figure S3** XPS spectra of F-RGO-PANI-II hybrid.

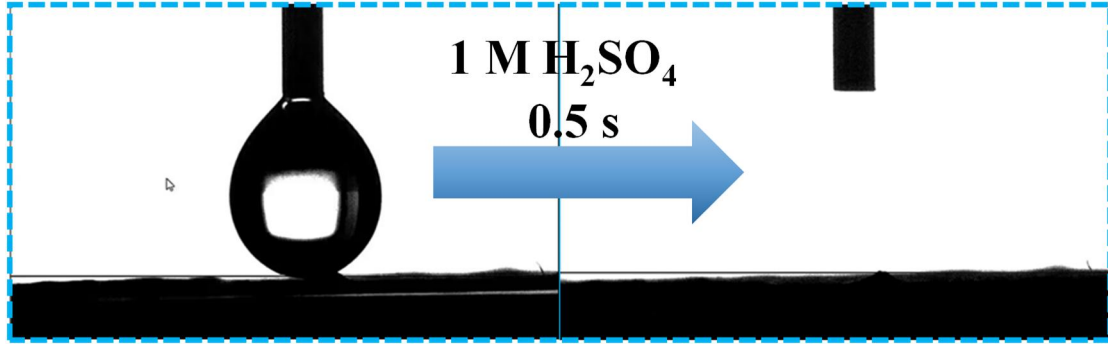

**Figure S4** Optical photograph of dynamic variations of electrolyte droplets (1 M H<sub>2</sub>SO<sub>4</sub>) droplets spread on F-RGO-p-PANI hybrid.

From the Figure S4, it could be found that the contact angle of electrolyte (1 M H<sub>2</sub>SO<sub>4</sub>) was 0°, in which the electrolyte droplet could spread the our samples within 0.5 s, directly confirming the superwetting performance of our sample.

## References:

1. A. B. Deshmukh, P. K. Dwivedi, A. C. Nalawade, M. S. Qureshi and M. V. Shelke, *J Mater Sci*, 2020, **55**, 15667-15680.
2. A. H. A. Goncalves, P. H. C. Sicilian, O. C. Alves, D. V. Cesar, C. A. Henriques and A. B. Gaspar, *Top Catal*, 2020, **63**, 1017-1029.
3. L. Y. Chen, Z. Lin, C. L. Zhao, Y. Y. Zheng, Y. Zhou and H. Peng, *J Alloy Compd*, 2011, **509**, L1-L5.
4. N. H. Kera, M. Bhaumik, K. Pillay, S. S. Ray and A. Maity, *J Colloid Interf Sci*, 2017, **503**, 214-228.
